# Supplementary material for: Epicardially Placed Bioengineered Cardiomyocyte Xenograft in Immune-Competent Rat Model of Heart Failure
Source: Hindawi journal article supplement (doi:10.1155/2021/9935679), 2021-07-24
Supplement: f1 [file 9935679.f1.zip]

**Supplemental Figure 1: Surgical Deployment of Graft**

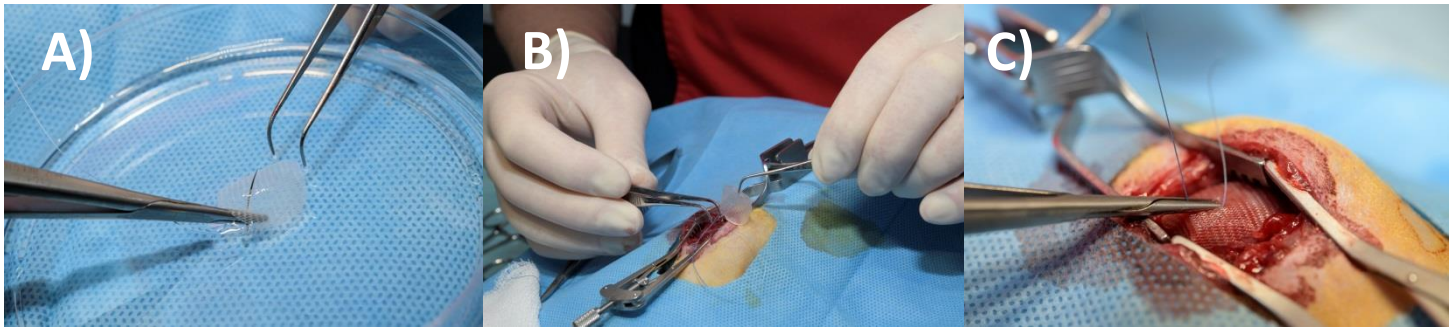

**Supplemental Figure 1.** Photographs of the engineered cardiac graft immediately prior to surgical implantation. The graft is observed A) in the transport petri dish as the surgeon prepares for manipulation, B) as the surgeon is actively handling the graft for surgical implantation, and C) after the first suture has been placed to secure the engineered cardiac graft to the rat's epicardium.
