# Supplementary material for: Epicardially Placed Bioengineered Cardiomyocyte Xenograft in Immune-Competent Rat Model of Heart Failure
Source: Hindawi journal article supplement (doi:10.1155/2021/9935679), 2021-07-24
Supplement: f1 [file 9935679.f1.zip]

**Supplemental Video 1:** *In Vitro* Graft Exhibits Spontaneous and Synchronous Mechanical Activity

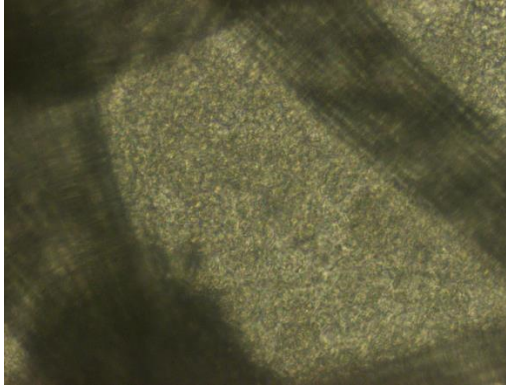

**Supplemental Video 1.** Video of engineered cardiac graft in 6-well plate (10X magnification). The synthetic bioabsorbable biomaterial of the graft can be visualized as woven bundles of fibers, creating a lattice extracellular matrix for the human dermal fibroblasts and human induced pluripotent stem cell-derived cardiomyocytes. Wave fronts of spontaneous and synchronous mechanical activity can be observed via diffraction of the microscope fluorescent light.
