# Supplementary material for: Epicardially Placed Bioengineered Cardiomyocyte Xenograft in Immune-Competent Rat Model of Heart Failure
Source: Hindawi journal article supplement (doi:10.1155/2021/9935679), 2021-07-24
Supplement: f1 [file 9935679.f1.zip]

**Supplemental Figure 4:** Field Potentials from Engineered Cardiac Grafts

(A)

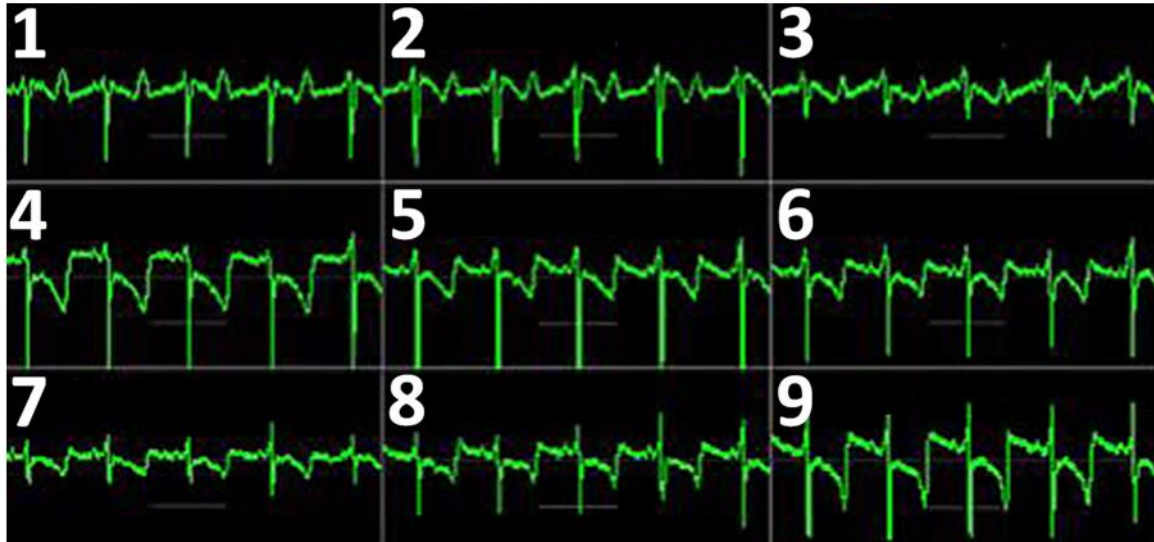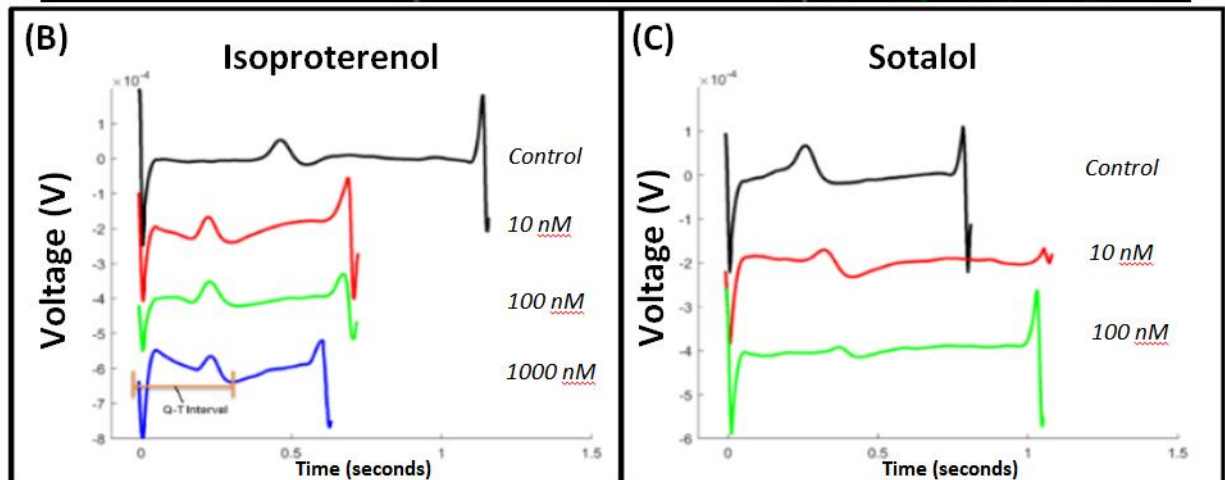

**Supplemental Figure 4.** Field potentials obtained from the Maestro MEA (Axion BioSystems), each in its own individual well with 64 flat gold electrodes.

(A) Sinus-like regular field potentials with negative or biphasic QRS complexes and clearly discernable T waves in nine independent engineered cardiac grafts.

(B) Application of non-specific beta-adrenergic receptor agonist Isoproterenol revealed graded increases in beat rate (RR interval) and graded decreases in QT interval.

(C) Application of non-specific beta-adrenergic receptor antagonist sotalol revealed graded decreases in beat rate (RR interval) and graded increases in QT interval.
