# Supplementary material for: Epicardially Placed Bioengineered Cardiomyocyte Xenograft in Immune-Competent Rat Model of Heart Failure
Source: Hindawi journal article supplement (doi:10.1155/2021/9935679), 2021-07-24
Supplement: f1 [file 9935679.f1.zip]

## Supplemental Figure 2: Rat Invasive Hemodynamics

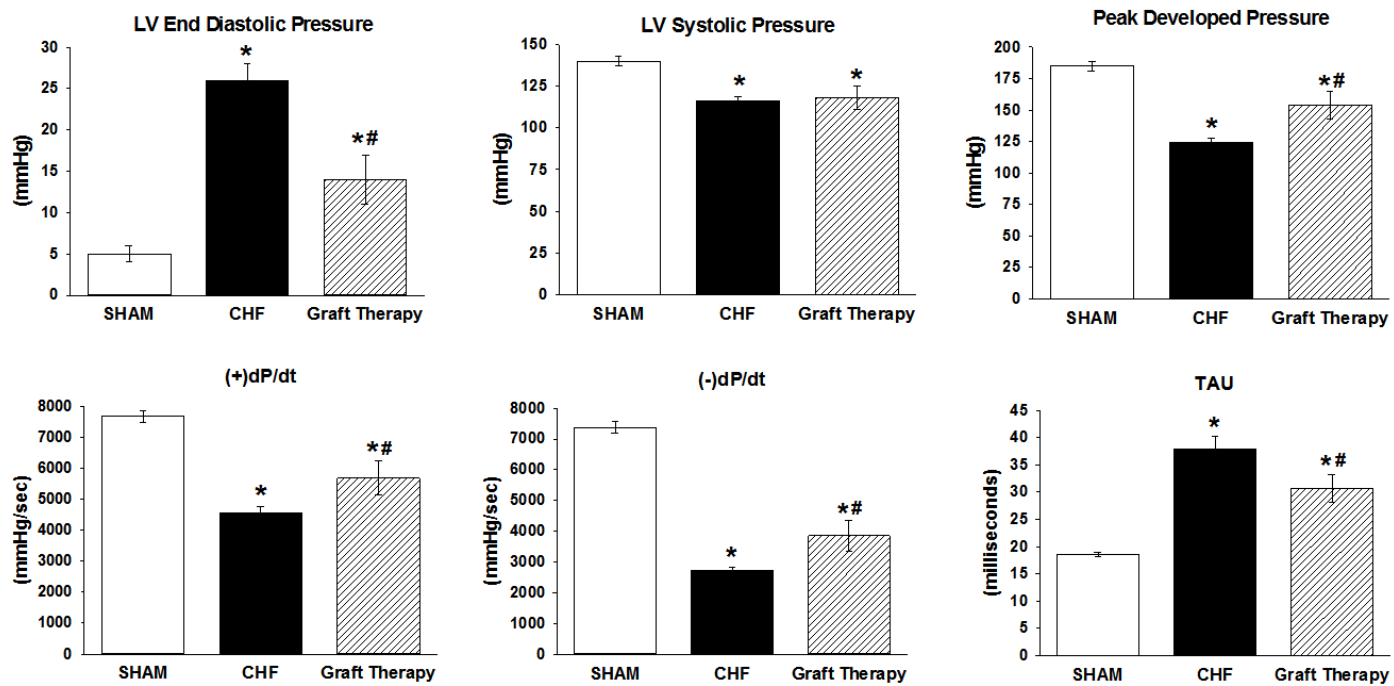

**Supplemental Figure 2.** A bar graph presenting invasive hemodynamic data as mean  $\pm$  standard error of the mean. SHAM ( $n=17$ ) data was collected at 6 weeks, while CHF ( $n=17$ ) and Graft Therapy ( $n=11$ ) data was collected at 10 weeks. CHF PDP contains  $n=15$ . Abbreviations are defined as follows: EDP: Left Ventricular End Diastolic Pressure, SP: Left Ventricular Systolic Pressure,  $\pm$ dP/dt: change in Left Ventricular pressure over change in time, PDP: Left Ventricular Peak-Developed Pressure. \* ANOVA-Tukey versus SHAM,  $p<0.05$ . # ANOVA-Tukey versus CHF,  $p<0.05$ .
