# Supplementary material for: Epicardially Placed Bioengineered Cardiomyocyte Xenograft in Immune-Competent Rat Model of Heart Failure
Source: Hindawi journal article supplement (doi:10.1155/2021/9935679), 2021-07-24
Supplement: f1 [file 9935679.f1.zip]

### Supplemental Figure 3: Rat Echocardiography

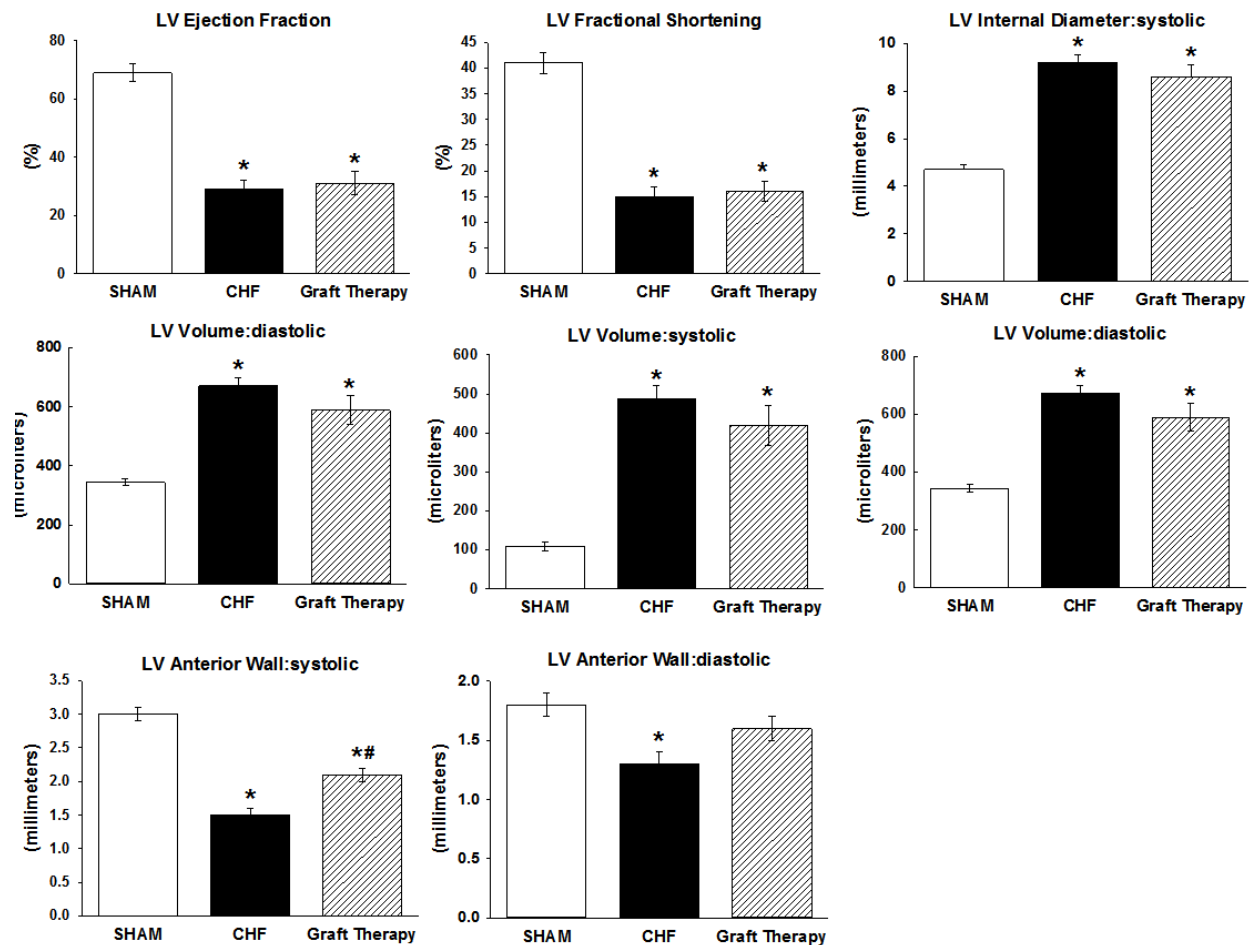

**Supplemental Figure 3.** A bar graph presenting transthoracic echocardiographic data (SAX M mode) as mean  $\pm$  standard error of the mean. SHAM ( $n=17$ ) data was collected at 6 weeks, while CHF ( $n=22$ ) and Graft Therapy ( $n=12$ ) data was collected at 10 weeks. Abbreviations are defined as follows: EF: Left Ventricular Ejection Fraction, FS: Left Ventricular Fractional Shortening, Sys: Systolic, Dia: Diastolic, iDiam = Left Ventricular Internal Diameter, Volume: Left Ventricular Volume, AW = Left Ventricular Anterior Wall thickness. \* ANOVA-Tukey versus SHAM,  $p < 0.05$ . # ANOVA-Tukey versus CHF,  $p < 0.05$ .
